# Supplementary figures and images for: Paediatric reference values for total psoas muscle area
Source: PubMed Central journal article supplement — J Cachexia Sarcopenia Muscle. 2020 Jan 9;11(2):405–14. doi: 10.1002/jcsm.12514 (PMC7113526; doi:10.1002/jcsm.12514), 2020-01-09

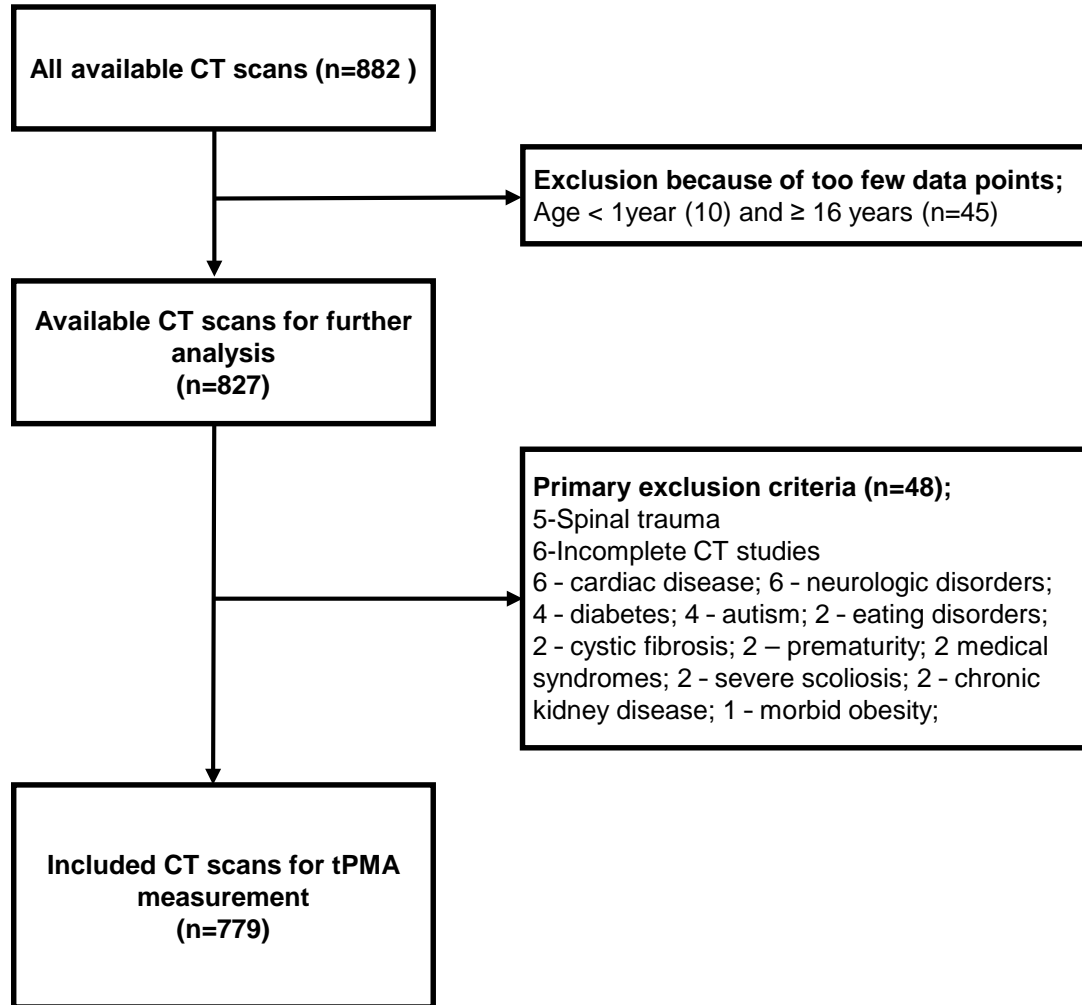

Supplement: JCSM-11-405-s001.pdf [file JCSM-11-405-s001.pdf]

**A** Age distribution, Males

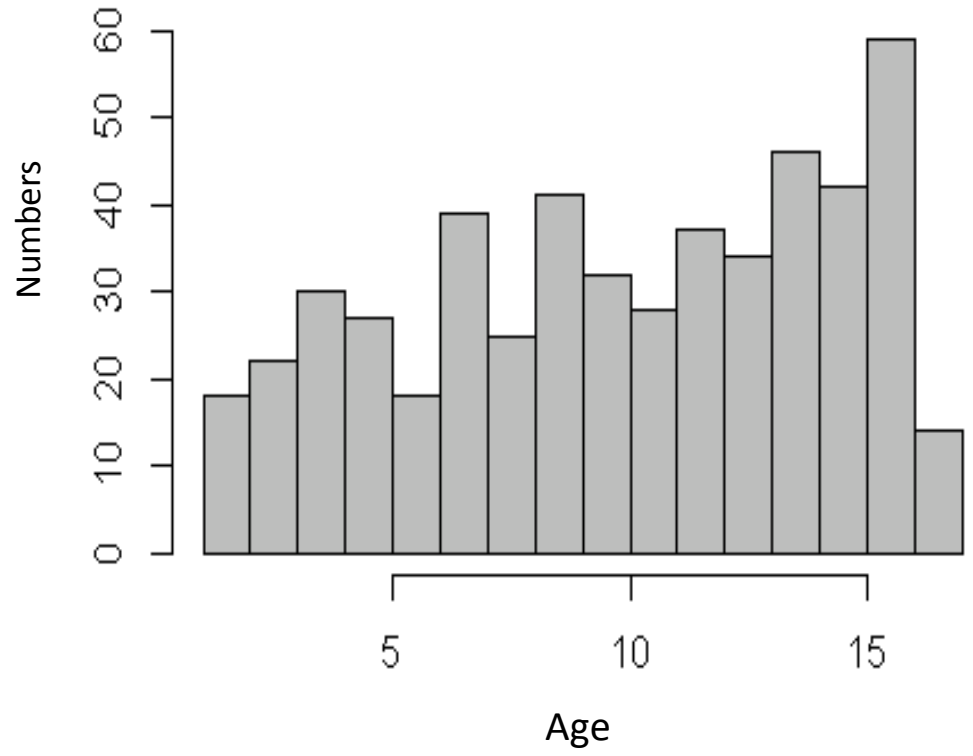

**B** Age distribution, Females

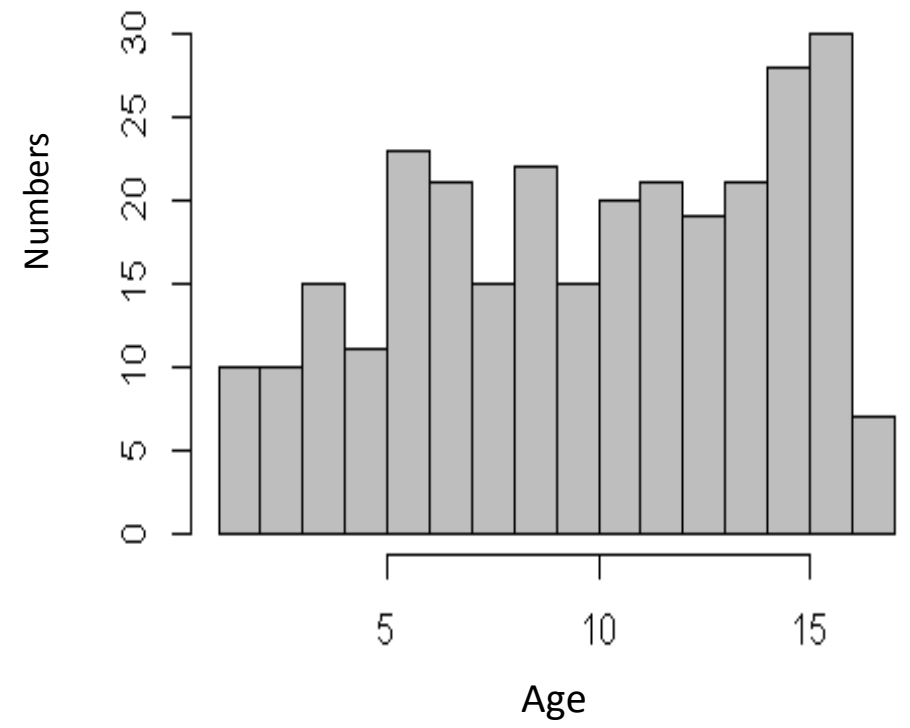

Supplement: JCSM-11-405-s002.pdf [file JCSM-11-405-s002.pdf]

**A**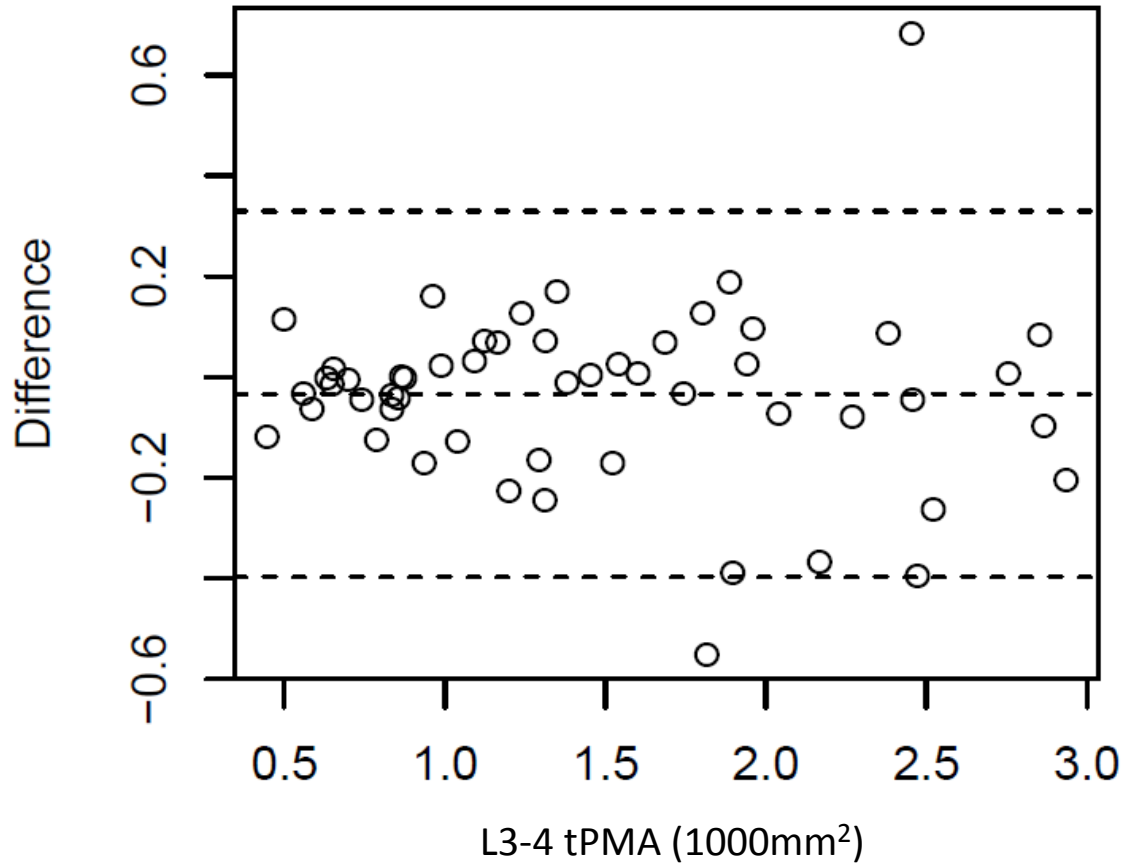**B**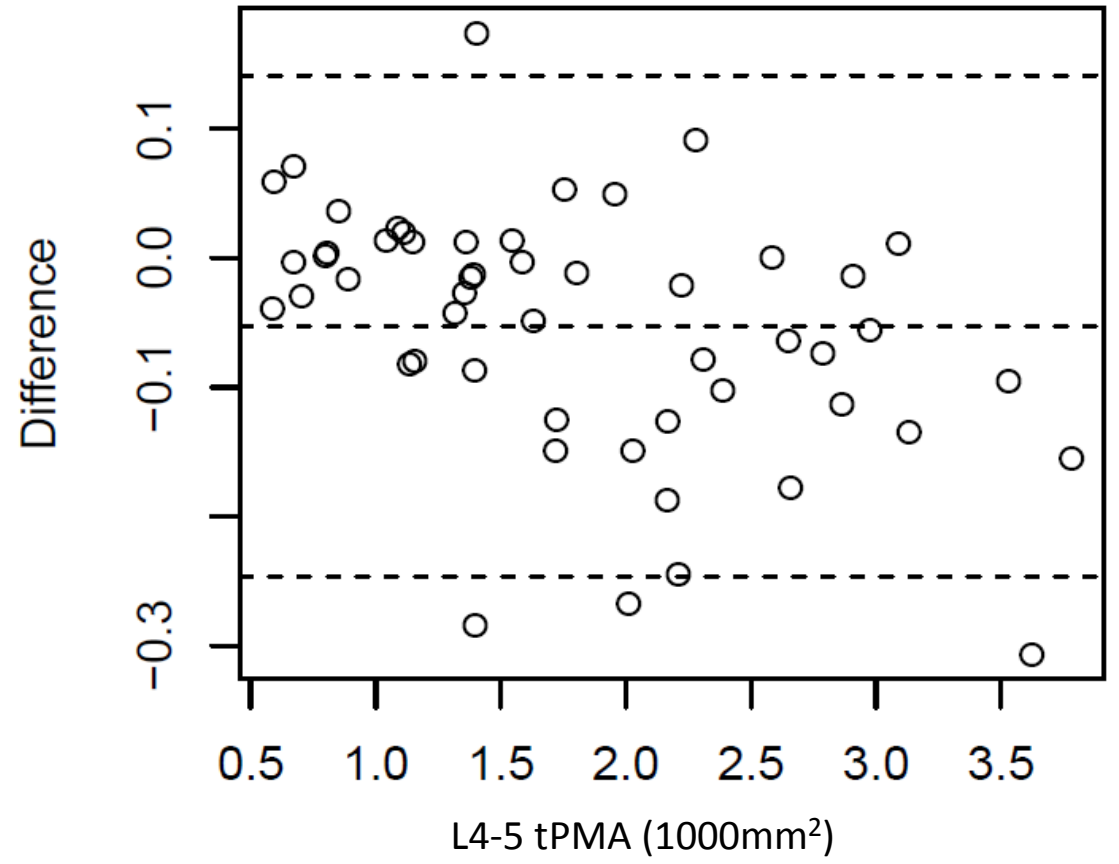

Supplement: JCSM-11-405-s003.pdf [file JCSM-11-405-s003.pdf]
